# Supplementary material for: STEPWISE – STructured lifestyle Education for People WIth SchizophrEnia: a study protocol for a randomised controlled trial
Source: Springer Nature journal article supplement (doi:10.1186/s13063-016-1572-1), 2016-09-28
Supplement: MOESM1 [file 10792038]

Additional file 1: STEPWISE Foundation and Booster Session Curriculum

|                 | Foundation course                                              |                                                 |                                                      |                                                       | Booster                                                                                                                                                           |
|-----------------|----------------------------------------------------------------|-------------------------------------------------|------------------------------------------------------|-------------------------------------------------------|-------------------------------------------------------------------------------------------------------------------------------------------------------------------|
|                 | Session 1                                                      | Session 2                                       | Session 3                                            | Session 4                                             | Sessions 1, 2 and 3                                                                                                                                               |
| Your story      | Your story                                                     | Sharing stories                                 | Sharing stories                                      | Sharing stories                                       | Sharing stories                                                                                                                                                   |
| Topic sessions  | Taking control of your weight: your medication and your weight | Taking control of your weight: Healthier snacks | Taking control of your weight: Calories and portions | Taking control of your weight: Eating out             | <ol style="list-style-type: none"> <li>1. Cooking healthy meals</li> <li>2. Physical activity revisited</li> <li>3. Being in the moment with your food</li> </ol> |
|                 | Taking control of your weight: healthier drinks                | Physical Activity and calories                  | Sedentary Behaviour                                  | Taking control of your weight: Making changes to food | Keeping it going                                                                                                                                                  |
| Next steps      | Next steps                                                     | Next steps                                      | Next steps                                           | Making a plan                                         | Next steps                                                                                                                                                        |
| Supporting tool | Weighing scales & water bottle                                 | Pedometer                                       | Cookery book<br>Food scales                          | Tape measure                                          | <ol style="list-style-type: none"> <li>1. Mixed herbs, spices, stock cubes</li> <li>2. Theraband</li> <li>3. Fridge magnet, calendar</li> </ol>                   |
